# Supplementary material for: Highly dispersed Co-N-RGO electrocatalyst based on an interconnected hierarchical pore framework for proton exchange membrane fuel cells
Source: Royal Society of Chemistry journal article supplement (doi:10.1039/d2cy01213h), 2022-01-01
Supplement: d2cy01213h1.pdf [file d2cy01213h1.pdf]

## Supporting Information

### **Highly dispersed Co-N-RGO electrocatalyst based on interconnected-hierarchical pore framework for Proton exchange membrane fuel cell**

**Jie Lian<sup>1</sup> · Qiang Bai<sup>1</sup> · Jinyu Zhao<sup>1</sup> · Xiaomin Wang<sup>1</sup>**

Corresponding author: Prof. Xiaomin Wang

E-mail: wangxiaomin@tyut.edu.cn

<sup>1</sup> College of Materials Science and Engineering, Taiyuan University of Technology,

Taiyuan 030024, China

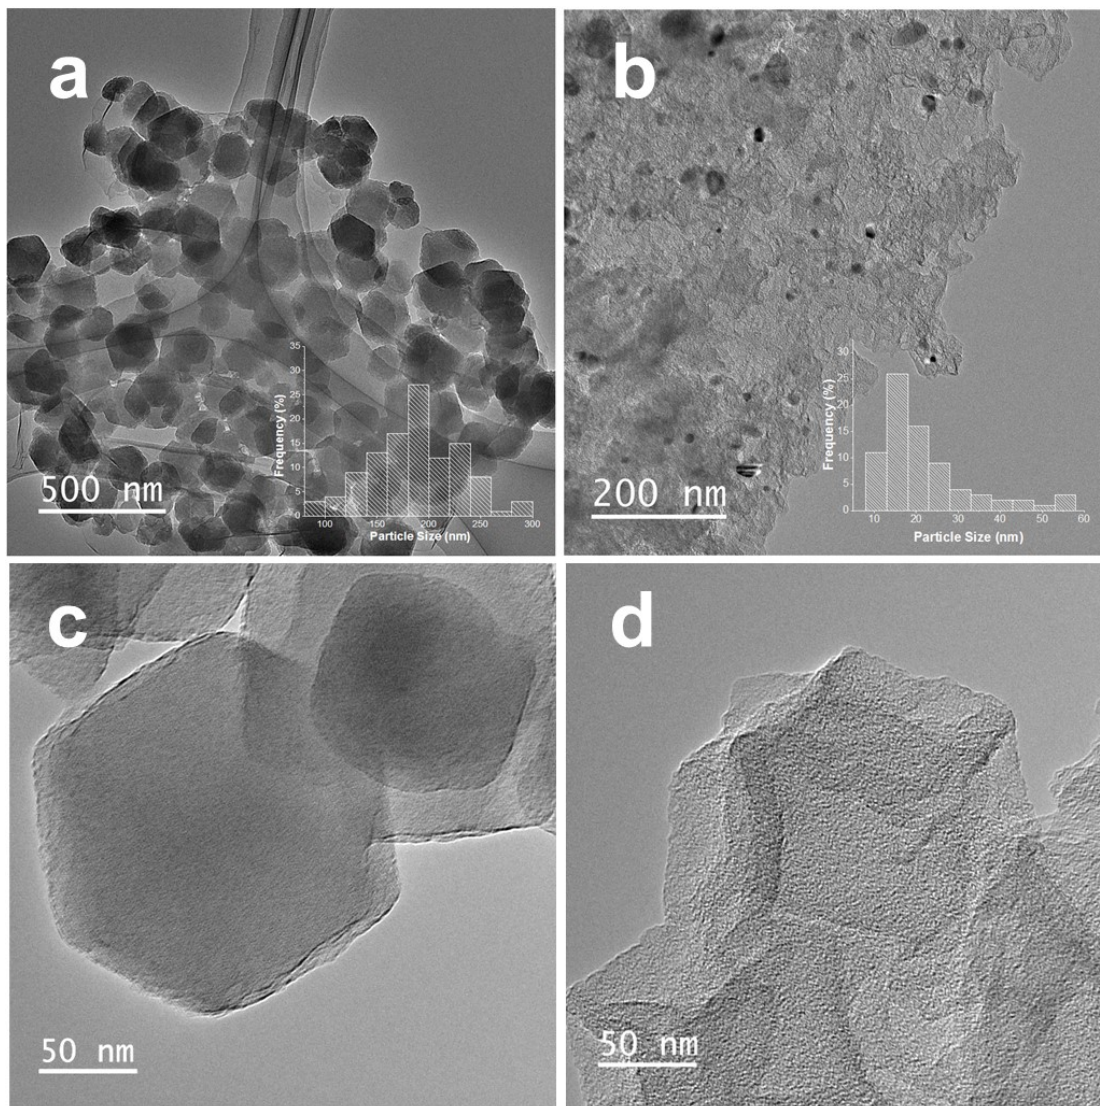

**Fig.S1 TEM images of (a) precursor of Co-N-RGO-1.5, (b) Co-N-RGO-3, (c) precursor of Co-N-RGO-1.5, (d) Co-N-RGO-1.5. The inserted histogram in (a, b) is the corresponding statistics of particle size distribution.**

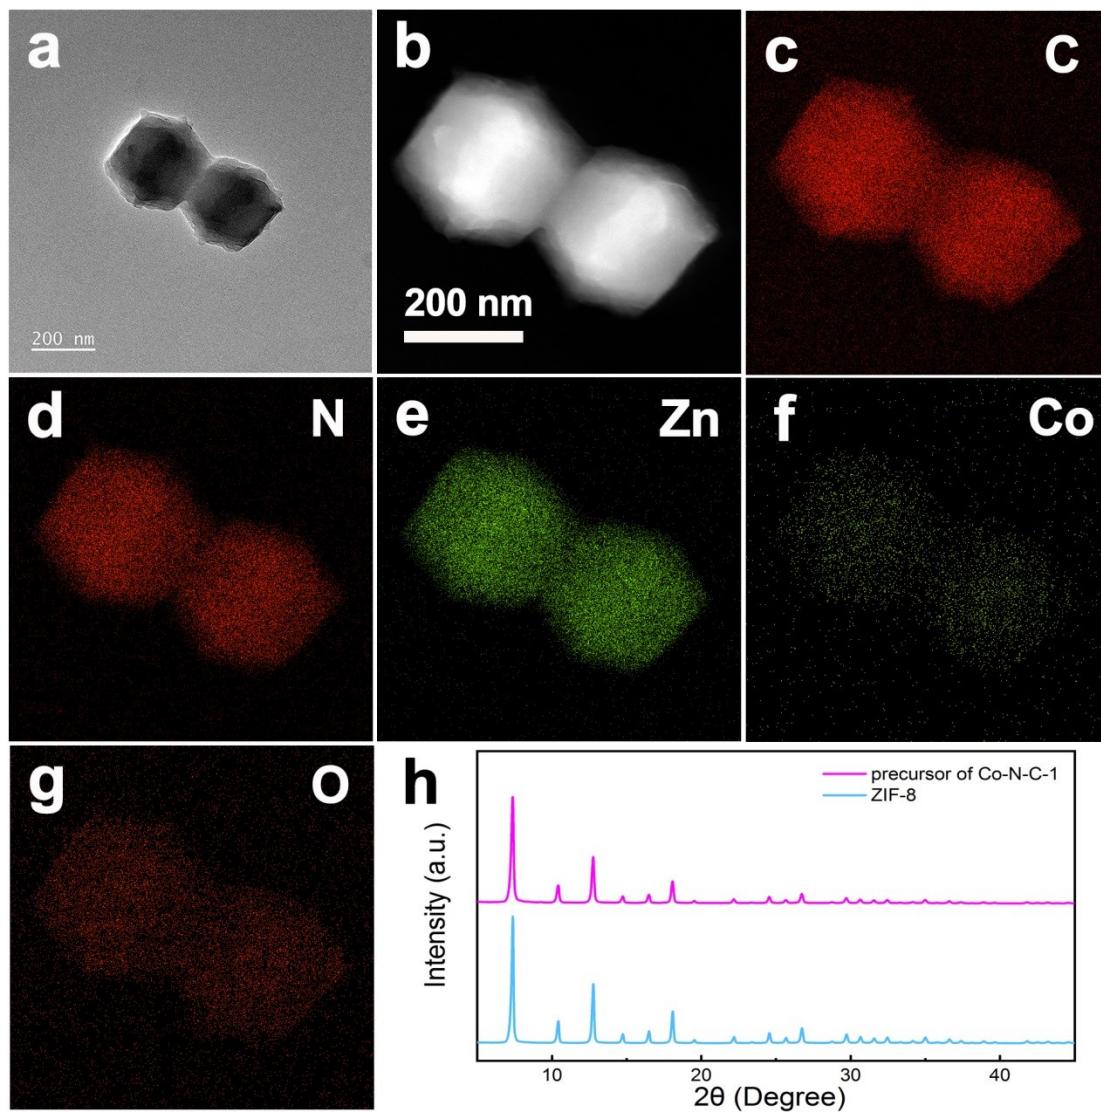

Fig. S2 (a) TEM and (b) STEM images of the precursor of Co-N-C-1. Elemental mappings of (c) C, (d) N, (e) Zn, (f) Co and (g) O of the area in (b). (h) XRD patterns of ZIF-8 and the precursor of Co-N-C-1.

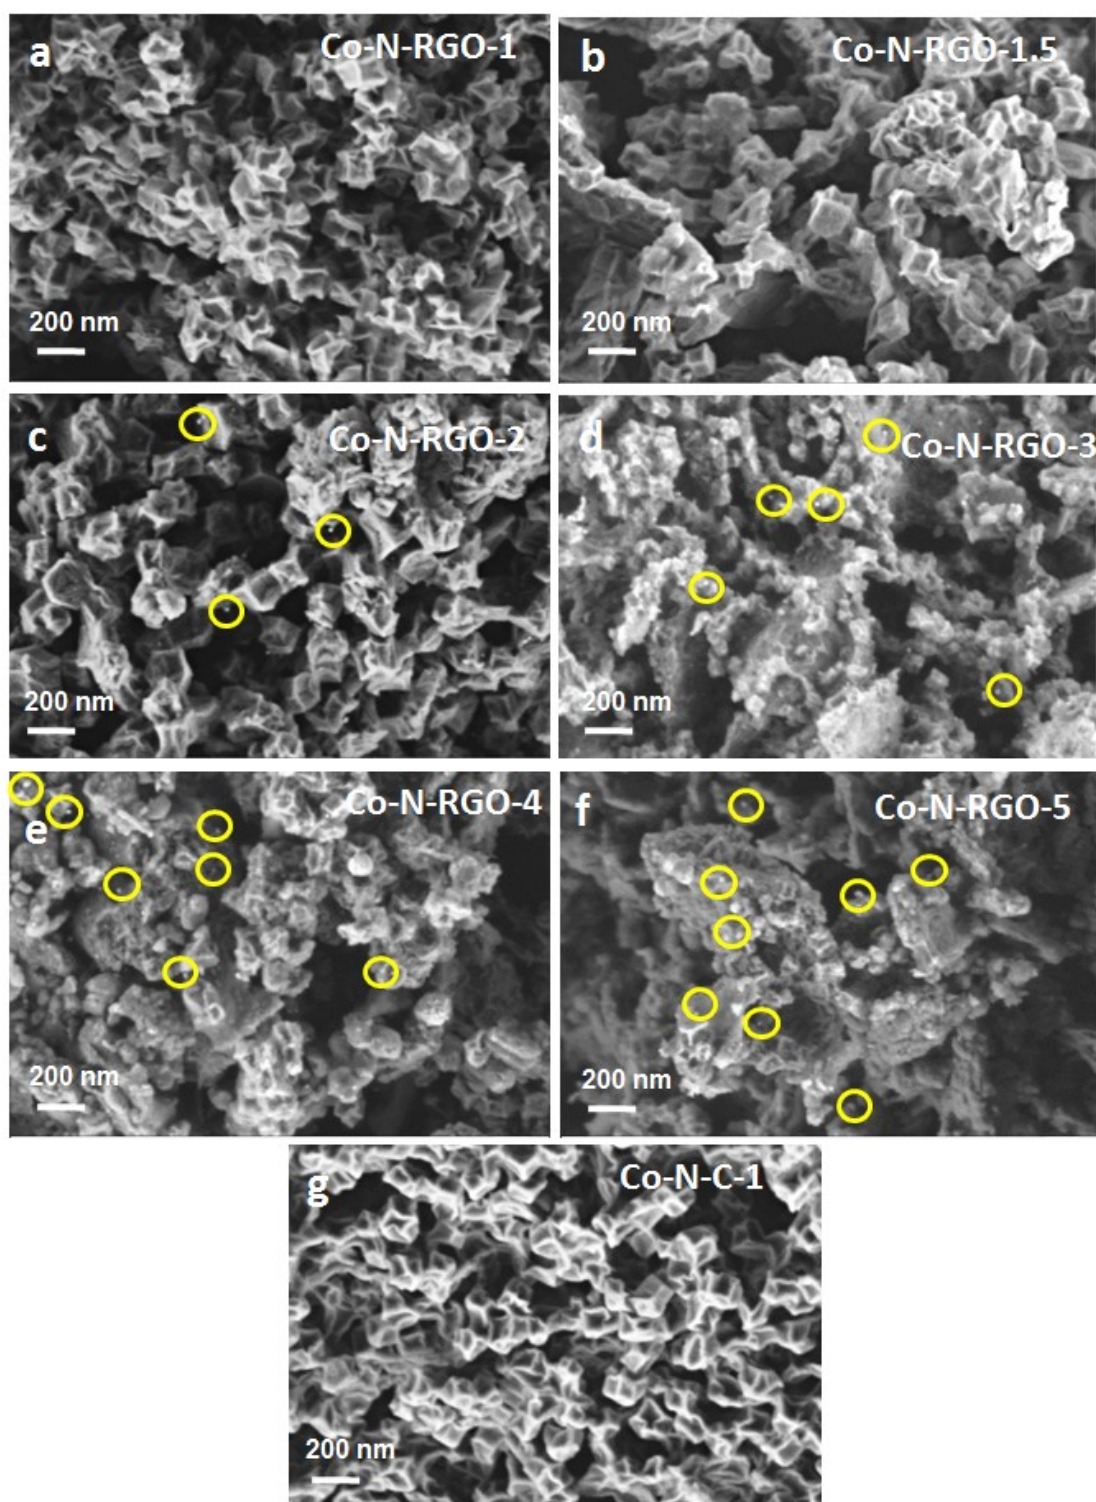

**Fig. S3 SEM images of synthesized samples**

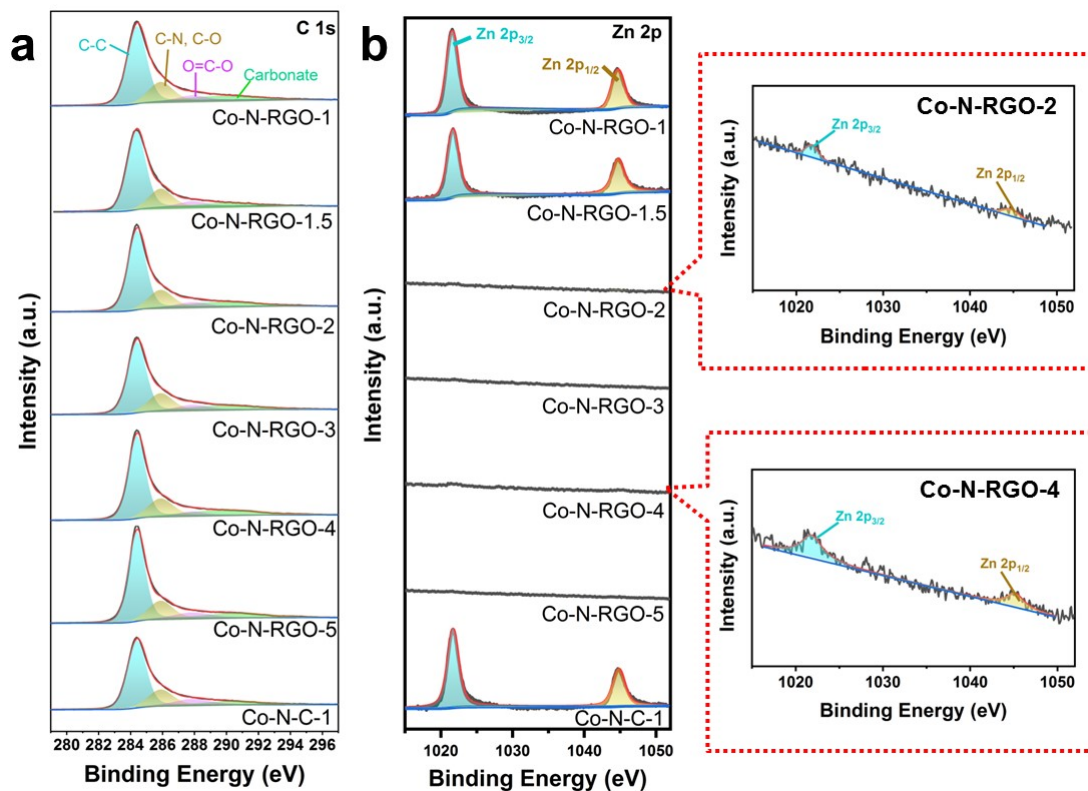

**Fig. S4 High-resolution XPS data of (a) C 1s and (b) Zn 2p**

**Table S1 Relative contents of various C species in samples.**

| Sample       | C-C<br>(at.%) | C-N & C-O<br>(at.%) | O=C-O<br>(at.%) | Carbonate<br>(at.%) | total C<br>content<br>(at.%) |
|--------------|---------------|---------------------|-----------------|---------------------|------------------------------|
| Co-N-RGO-1   | 62.9          | 19.6                | 5.7             | 11.8                | 85.52                        |
| Co-N-RGO-1.5 | 67.5          | 19.3                | 6.0             | 7.2                 | 84.24                        |
| Co-N-RGO-2   | 63.3          | 18.4                | 5.4             | 12.8                | 86.58                        |
| Co-N-RGO-3   | 62.0          | 19.2                | 6.5             | 12.3                | 83.43                        |
| Co-N-RGO-4   | 62.9          | 18.9                | 3.7             | 14.5                | 88.64                        |
| Co-N-RGO-5   | 63.5          | 18.0                | 7.6             | 10.9                | 89.83                        |
| Co-N-C-1     | 63.0          | 18.9                | 9.5             | 8.6                 | 85.38                        |

**Table S2 Relative contents of various N species in samples.**

| Sample       | pyridinic N<br>(at.%) | Co-N <sub>x</sub><br>(at.%) | pyrrolic-N<br>(at.%) | graphitic N<br>(at.%) | oxidized N<br>(at.%) | total N<br>content<br>(at.%) |
|--------------|-----------------------|-----------------------------|----------------------|-----------------------|----------------------|------------------------------|
| Co-N-RGO-1   | 51.7                  | 10.8                        | 20.2                 | 6.7                   | 10.6                 | 8.97                         |
| Co-N-RGO-1.5 | 47.3                  | 15.2                        | 17.0                 | 10.2                  | 10.2                 | 8.31                         |
| Co-N-RGO-2   | 36.6                  | 17.3                        | 21.9                 | 12.4                  | 11.9                 | 5.70                         |
| Co-N-RGO-3   | 37.7                  | 19.2                        | 16.6                 | 15.1                  | 11.3                 | 7.73                         |
| Co-N-RGO-4   | 29.2                  | 15.7                        | 19.1                 | 23.2                  | 12.8                 | 4.78                         |
| Co-N-RGO-5   | 28.5                  | 15.6                        | 19.2                 | 24.9                  | 11.8                 | 4.07                         |
| Co-N-C-1     | 42.9                  | 6.4                         | 31.9                 | 10.0                  | 8.9                  | 6.92                         |

**Table S3 Relative contents of various Co species in samples.**

| Sample       | Metallic Co<br>(at.%) | Co <sub>x</sub> -O <sub>y</sub><br>(at.%) | Co-N <sub>x</sub><br>(at.%) | Satellite<br>(at.%) | total Co<br>content<br>(at.%) |
|--------------|-----------------------|-------------------------------------------|-----------------------------|---------------------|-------------------------------|
| Co-N-RGO-1   | 5.1                   | 37.9                                      | 36.6                        | 20.4                | 0.49                          |
| Co-N-RGO-1.5 | 5.3                   | 34.8                                      | 34.7                        | 25.2                | 0.64                          |
| Co-N-RGO-2   | 5.8                   | 36.1                                      | 25.7                        | 32.4                | 1.28                          |
| Co-N-RGO-3   | 8.4                   | 28.9                                      | 29.8                        | 32.9                | 1.73                          |
| Co-N-RGO-4   | 11.8                  | 34.0                                      | 32.5                        | 21.8                | 1.30                          |
| Co-N-RGO-5   | 13.2                  | 31.5                                      | 25.4                        | 29.9                | 1.11                          |
| Co-N-C-1     | 5.8                   | 29.3                                      | 28.3                        | 36.6                | 0.55                          |

**Table S4 Relative contents of Zn species in samples.**

| <b>Sample</b>                | <b>total Zn content<br/>(at.%)</b> |
|------------------------------|------------------------------------|
| <b>Co-N-RGO-1</b>            | <b>0.69</b>                        |
| <b>Co-N-RGO-1.5</b>          | <b>0.62</b>                        |
| <b>Co-N-RGO-2</b>            | <b>0.01</b>                        |
| <b>Co-N-RGO-3</b>            | <b>0.01</b>                        |
| <b>Co-N-RGO-4</b>            | <b>0.02</b>                        |
| <b>Co-N-RGO-5</b>            | <b>0.01</b>                        |
| <b>Co-N-C-1</b>              | <b>0.67</b>                        |
| <b>precursor of Co-N-C-1</b> | <b>9.38</b>                        |

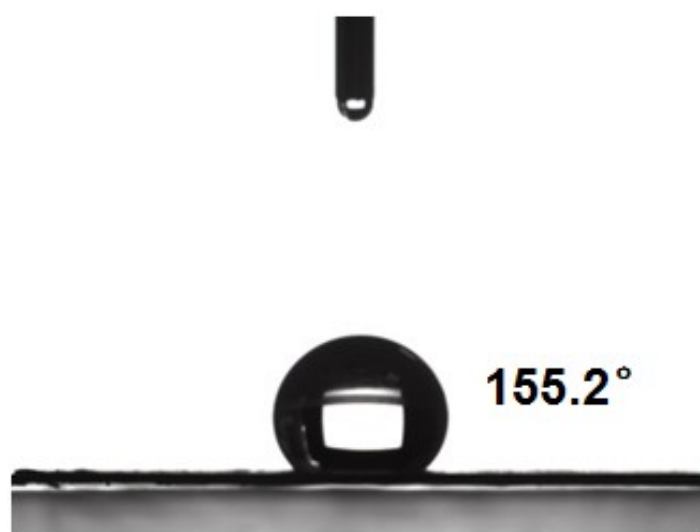

**Fig. S5 The contact angle tests between deionized water and the catalyst layer of Co-N-RGO-1.5 sample**



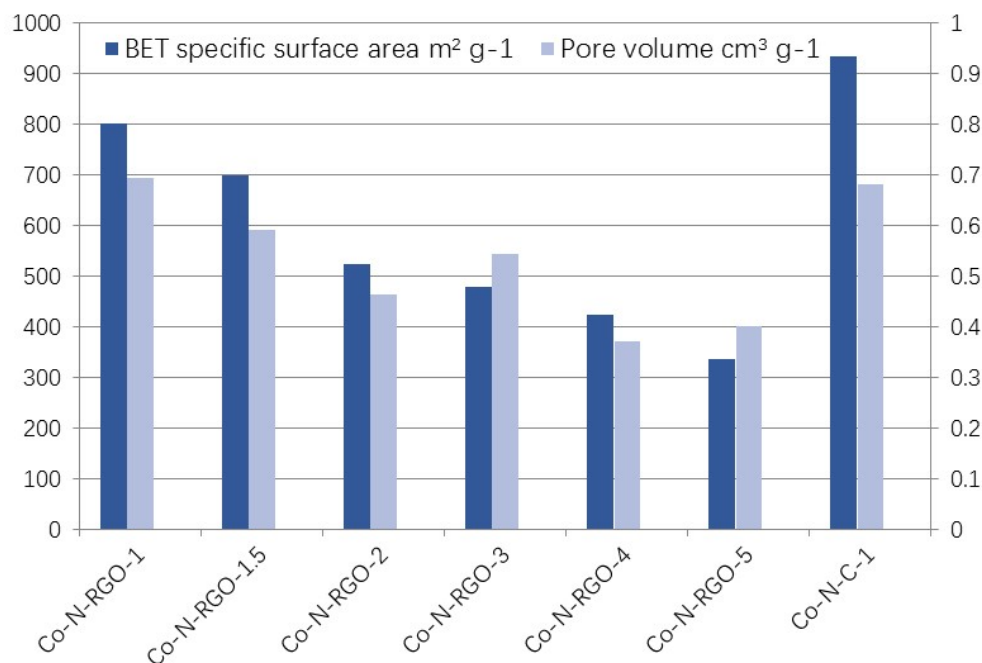

**Fig. S6 BET specific surface area and pore volume distribution**

**Table S5 Specific surface area and pore volume distribution of samples.**

| Sample       | $S_{\text{BET}}$<br>m <sup>2</sup> g <sup>-1</sup> | Pore volume<br>cm <sup>3</sup> g <sup>-1</sup> | $V_{\text{micropores}}$<br>cm <sup>3</sup> g <sup>-1</sup> | $V_{\text{mesopores \& macropores}}$<br>cm <sup>3</sup> g <sup>-1</sup> |
|--------------|----------------------------------------------------|------------------------------------------------|------------------------------------------------------------|-------------------------------------------------------------------------|
| Co-N-RGO-1   | 802.0443                                           | 0.693864                                       | 0.367557                                                   | 0.326307                                                                |
| Co-N-RGO-1.5 | 699.0128                                           | 0.591648                                       | 0.310218                                                   | 0.281430                                                                |
| Co-N-RGO-2   | 522.6528                                           | 0.463547                                       | 0.240491                                                   | 0.223056                                                                |
| Co-N-RGO-3   | 478.5023                                           | 0.543165                                       | 0.218958                                                   | 0.324207                                                                |
| Co-N-RGO-4   | 424.7778                                           | 0.370319                                       | 0.190819                                                   | 0.179500                                                                |
| Co-N-RGO-5   | 335.5853                                           | 0.400661                                       | 0.151920                                                   | 0.248741                                                                |
| Co-N-C-1     | 934.4712                                           | 0.680550                                       | 0.463552                                                   | 0.216998                                                                |

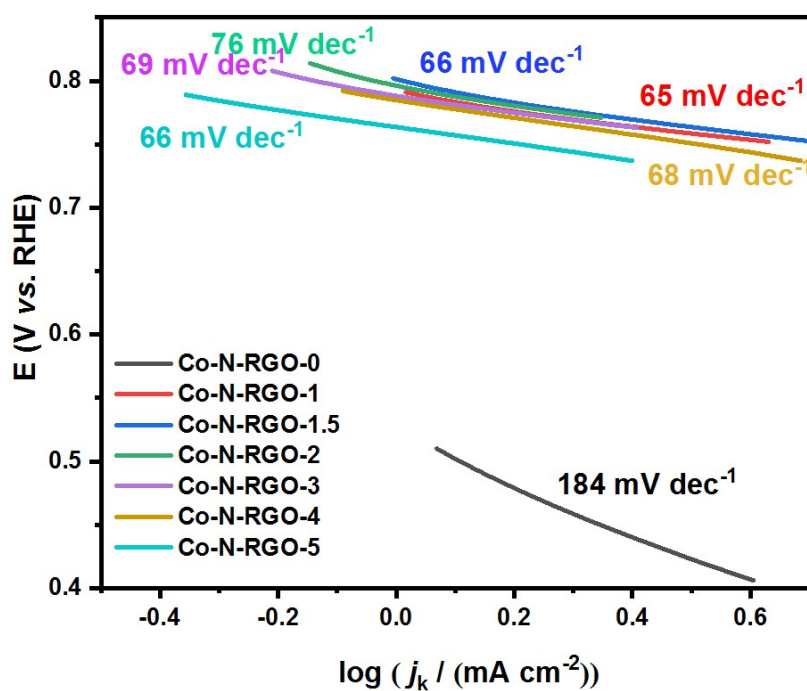

Fig. S7 Tafel slope of synthesized catalysts

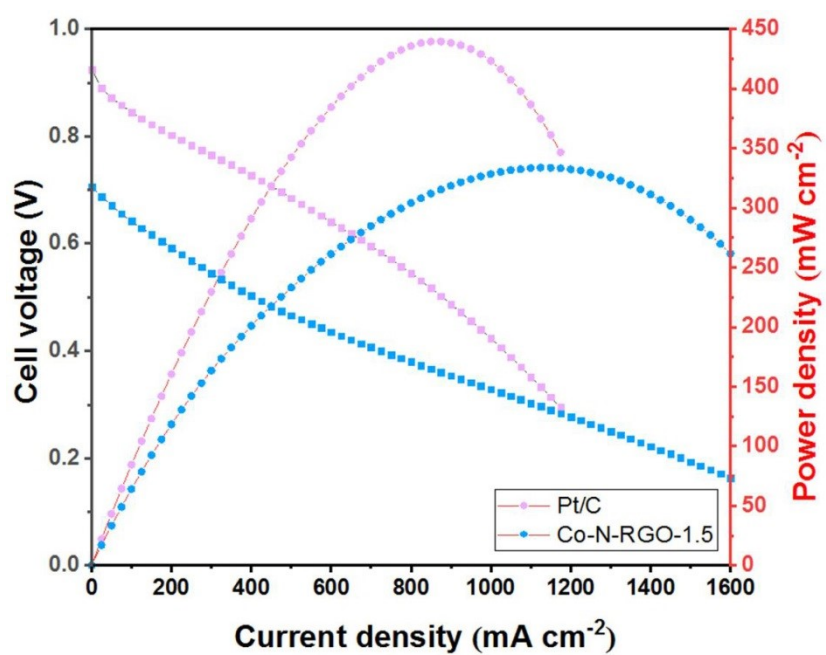

Fig. S8 The performance of Co-N-RGO-1.5 and commercial Pt/C fuel cell

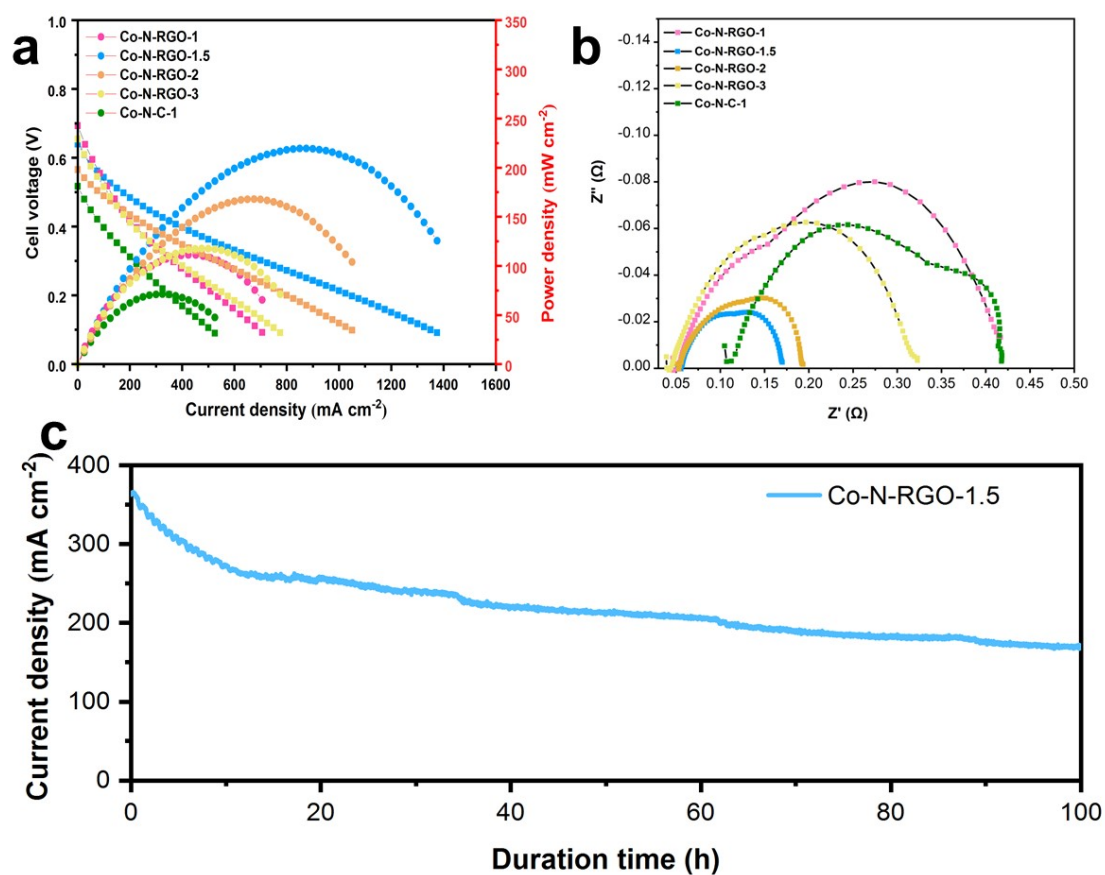

**Fig. S9** (a)The performance and (b)EIS image of fuel cells after 24-hour stability test. (c) The variation of current density of  $\text{H}_2/\text{O}_2$  PEMFC with Co-N-RGO-1.5 catalyst as the cathode at 0.5 V for 100 hours. Testing conditions: 1 bar backpressures; Flow rate: 200  $\text{scm}$  for both  $\text{H}_2$  and  $\text{O}_2$ , humidified at  $80^\circ\text{C}$ ; MEA active area:  $2.01 \text{ cm}^2$ ; Nafion 211 membrane; Cathode loading:  $4.0 \text{ mg cm}^{-2}$ ; Anode catalyst: Pt/C with loading of  $0.5 \text{ mg}_{\text{Pt}} \text{ cm}^{-2}$ .

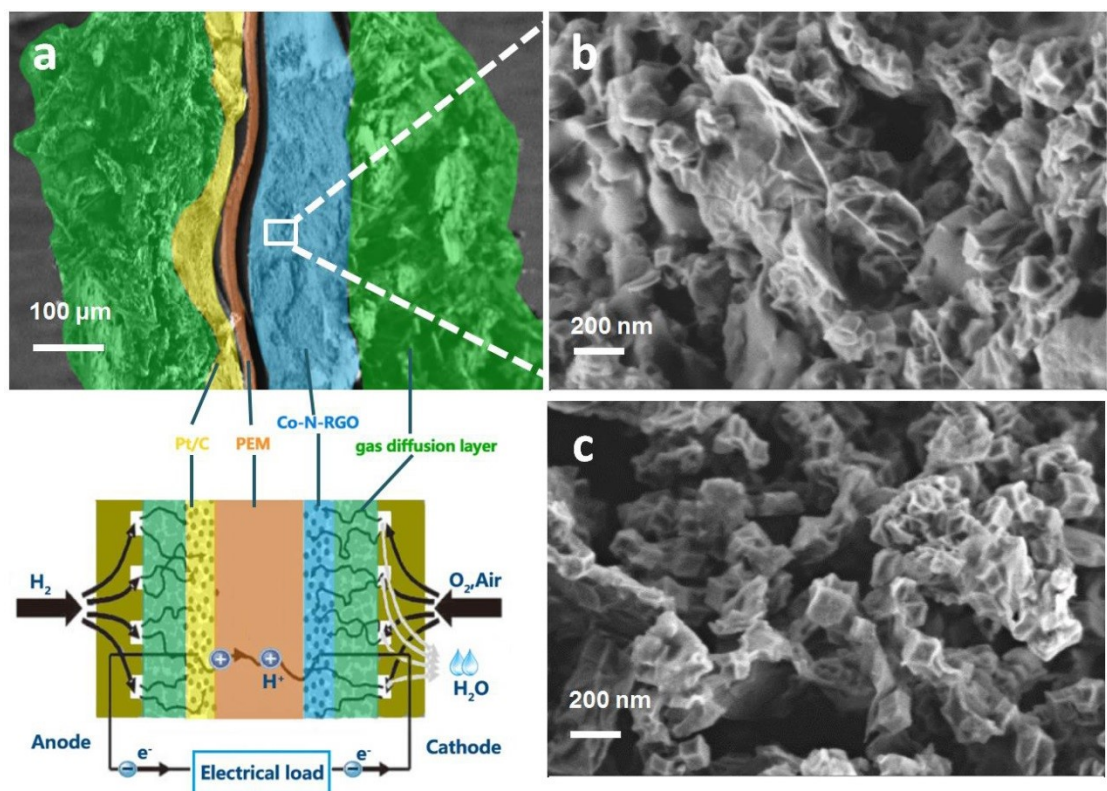

Fig. S10 SEM images of Co-N-RGO-1.5, (a) MEA and schematic diagram, (b) after MEA test, (c) before MEA test
